# Supplementary material
Source: publisher figshare collection journal article supplement (https://acs.figshare.com/ndownloader/files/3949189)
Supplement: Supplementary file 1 [file 3949189]

**Supplementary information for:**

# Multi-layer epitaxial growth of lead-phthalocyanine and C<sub>70</sub> using CuBr as a templating layer for the efficiency enhancement of organic photovoltaic cells

*Tae-Min Kim,<sup>†</sup> Hyun-Sub Shim,<sup>†</sup> Min-Soo Choi,<sup>†</sup> Hyo Jung Kim,<sup>‡</sup> and Jang-Joo Kim<sup>\*†</sup>*

<sup>†</sup> Department of Materials Science and Engineering and the Center for Organic Light Emitting Diode, Seoul National University, Seoul 151-744, South Korea

<sup>‡</sup> Department of Organic Material Science and Engineering, College of Engineering, Pusan National University, Busan 609-735, South Korea

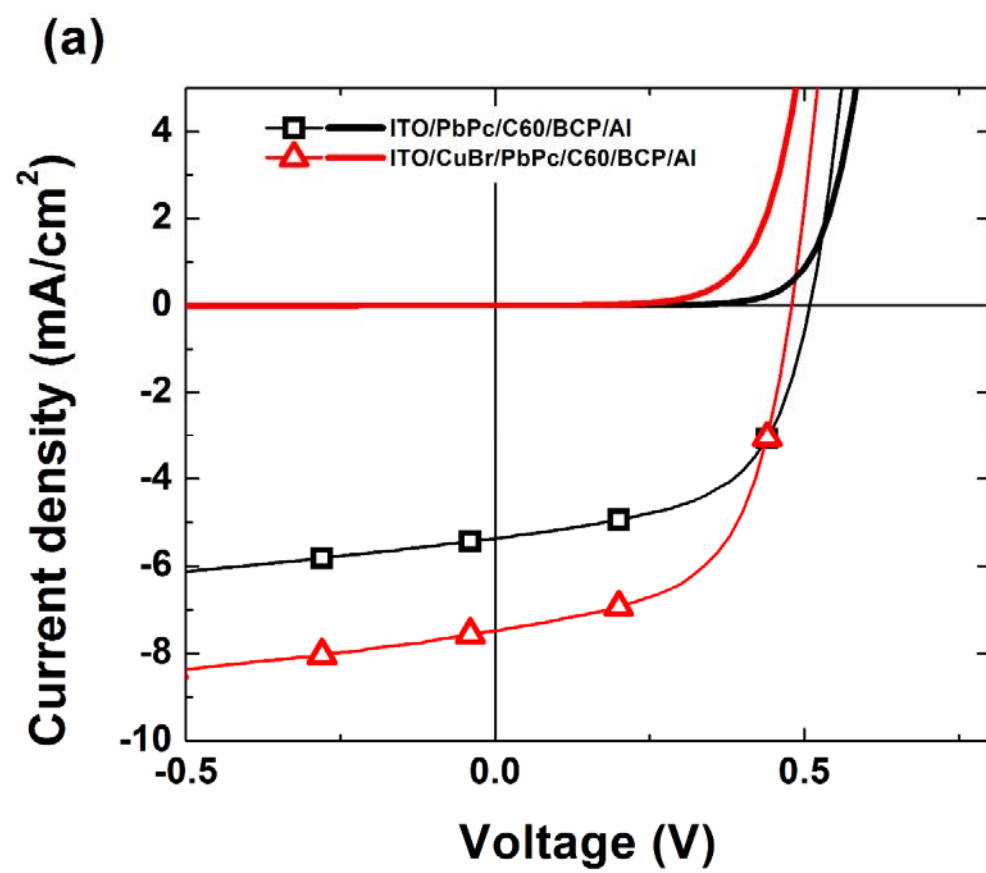

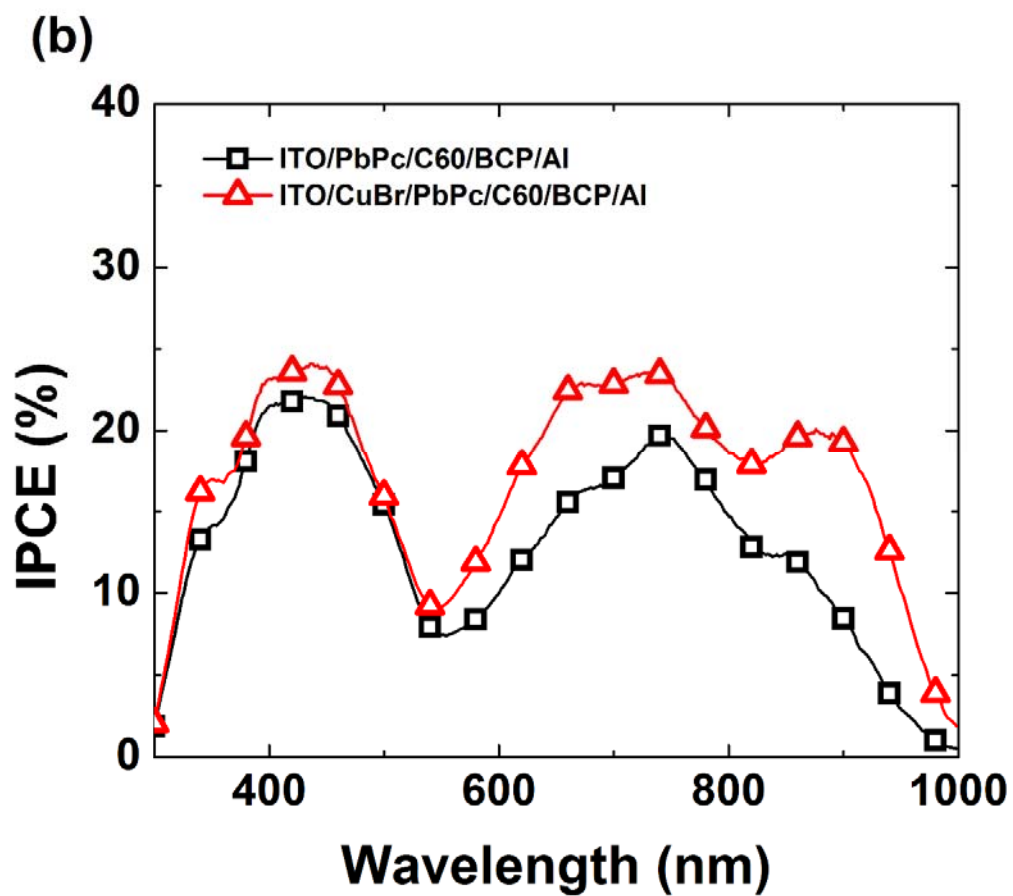

Figure S1. a)  $J$ - $V$  curves and b) IPCE spectra of ITO/PbPc (20 nm)/C<sub>60</sub> (40 nm)/BCP (8 nm)/Al (black square) and ITO/CuBr (3 nm)/PbPc (20 nm)/C<sub>60</sub> (40 nm)/BCP (8 nm)/Al (red triangle) devices under AM1.5.
